# Supplementary material
Source: MDPI journal article supplement (https://www.mdpi.com/2076-3417/10/11/4045)
Supplement: s1 [file s1]

## Supplementary Material

# Investigations of the energy transfer in the phycobilisome antenna of *Arthrospira plantesis* using time-resolved spectroscopy

Alexandra Fălămaș<sup>1,\*</sup>, Sebastian A. Porav<sup>1,2</sup>, and Valer Toșă<sup>1</sup>

<sup>1</sup> National Institute for Research and Development of Isotopic and Molecular Technologies, 67-103 Donat Street, 400293, Cluj-Napoca, Romania; Alexandra.falamas@itim-cj.ro

<sup>2</sup> Institute of Biological Research, 48 Republicii Street, 400015, Cluj-Napoca, Romania; sebastian.porav@itim-cj.ro

\* Correspondence: alexandra.falamas@e-mail.com; sebastian.porav@itim-cj.ro

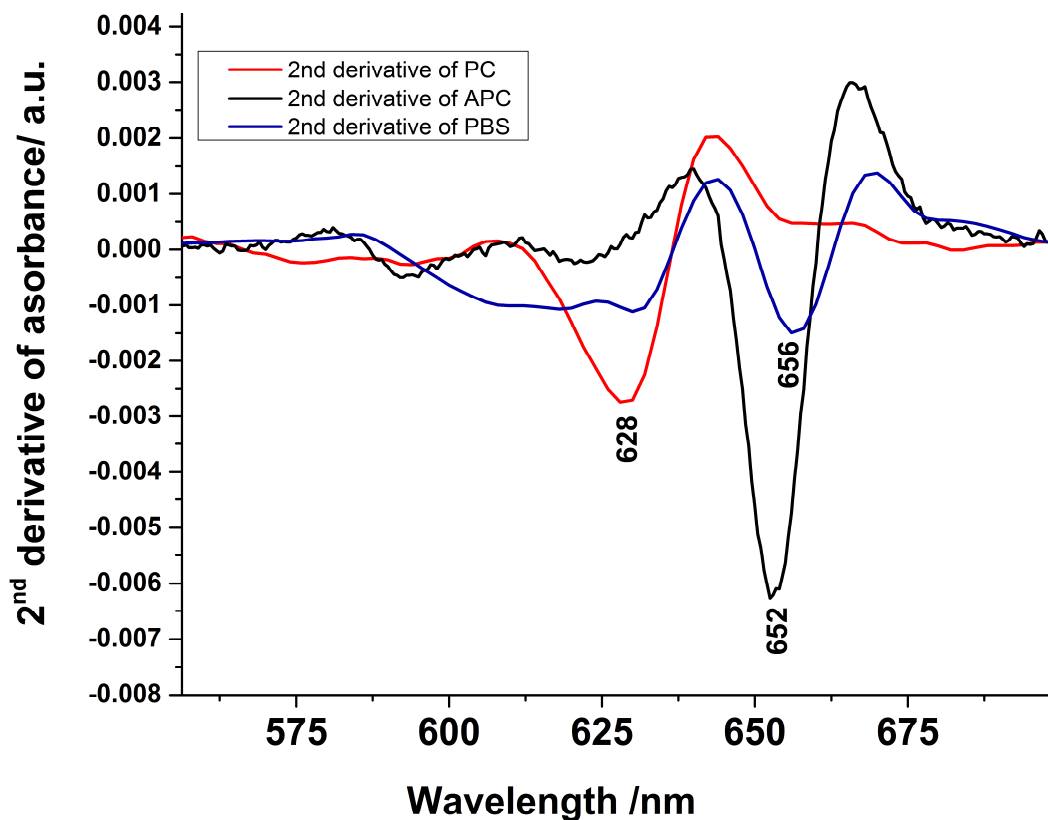

Figure S1. The 2<sup>nd</sup> derivative of the absorbance spectra characteristic to the PBS, PC, and APC.

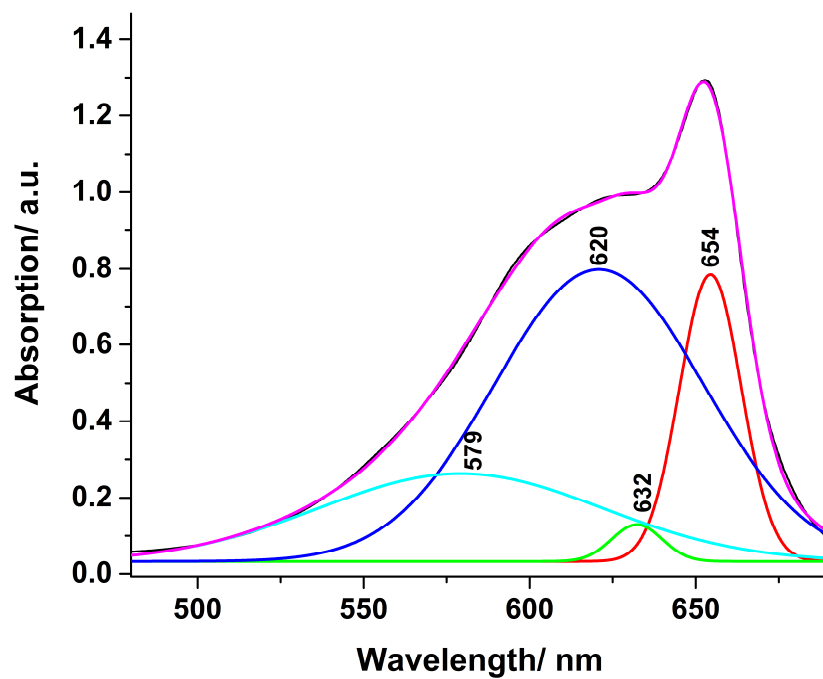

**Figure S2.** Steady-state absorption spectrum of APC and its deconvolution using a Gauss model

| Peak wavelength | FWHM   | Amplitude |
|-----------------|--------|-----------|
| 579 nm          | 100.84 | 24.87     |
| 620 nm          | 74.11  | 60.43     |
| 632 nm          | 17.86  | 1.84      |
| 654 nm          | 21.85  | 17.5      |

$$R^2=0.99957$$

$$\chi^2=6.7E-5$$

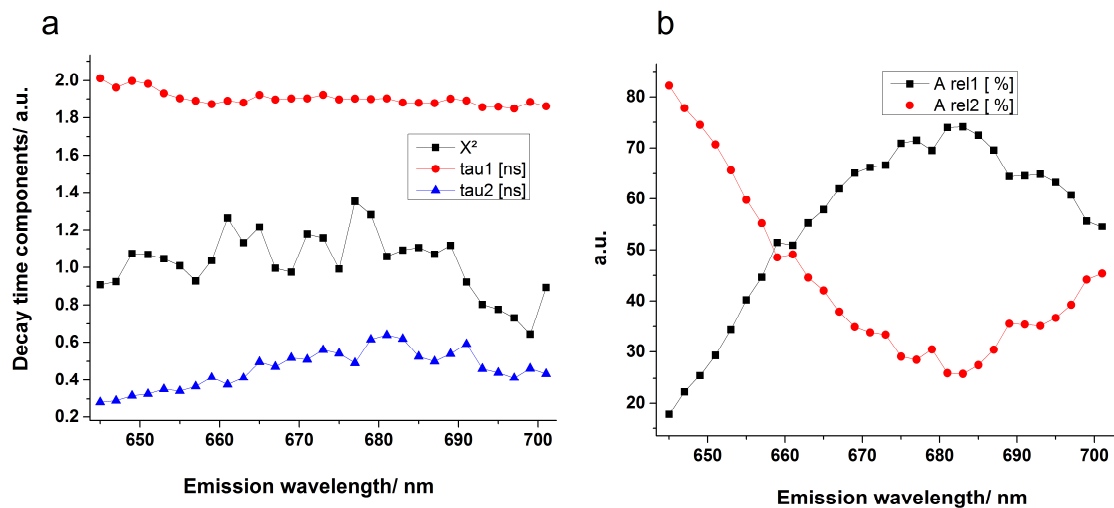

**Figure S3.** (a) The two lifetime components characteristic to the PBS obtained from the TCSPC data using a reconvolution model with a double exponential function and their variation with the probed emission wavelength; (b) The corresponding relative amplitudes and their modification with the detection wavelength.
